# Supplementary material for: Respiratory Bacteria Stabilize and Promote Airborne Transmission of Influenza A Virus
Source: PubMed Central journal article supplement (PMC7470989; doi:10.1128/msystems.00762-20), 2020-09-01

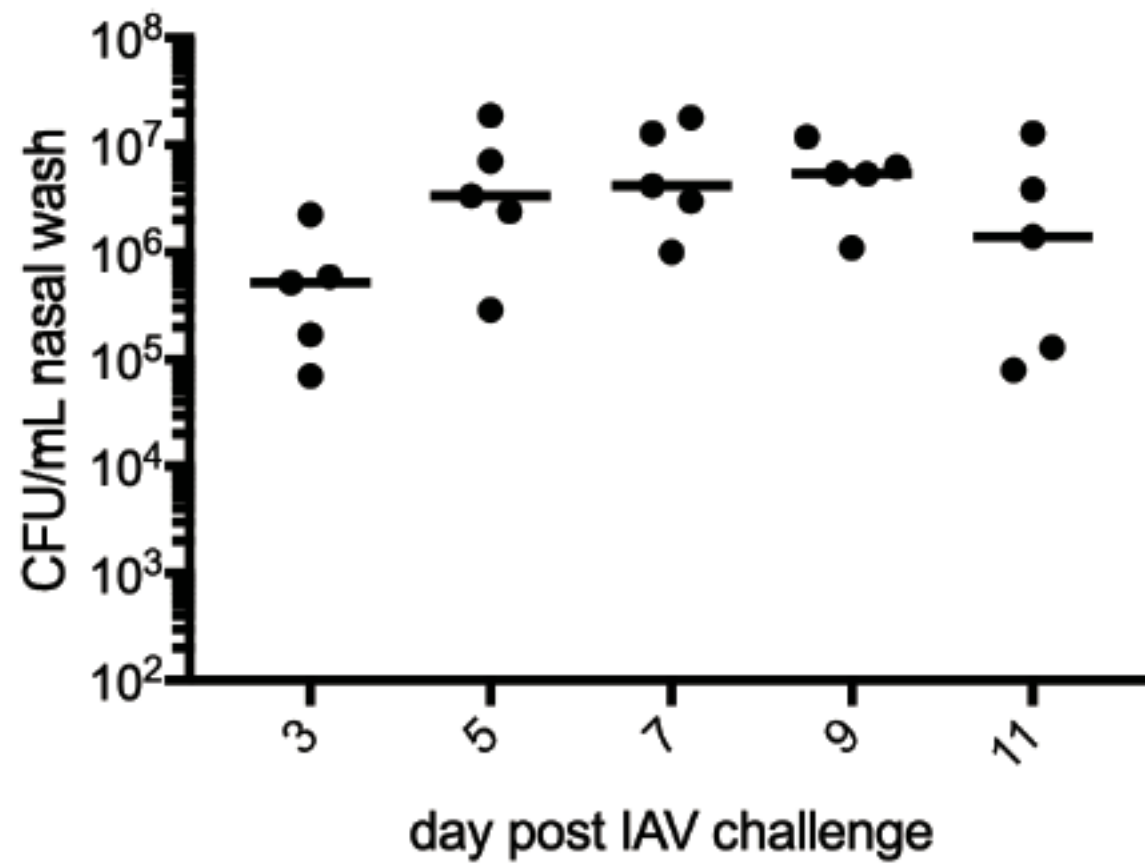

Supplement: mSystems.00762-20-sf004.pdf [file mSystems.00762-20-sf004.pdf]
