# Supplementary material for: Respiratory Bacteria Stabilize and Promote Airborne Transmission of Influenza A Virus
Source: PubMed Central journal article supplement (PMC7470989; doi:10.1128/msystems.00762-20), 2020-09-01
Supplement: mSystems.00762-20-st001.pdf [file mSystems.00762-20-st001.pdf]

Supplemental Table 1: Symptom scores of donor ferrets

| Ferret ID                      | Max Weight loss (% starting weight) | Max temperature, fever <sup>a</sup> bold text | Max lethargy score <sup>b</sup> | Days with Sneezing | Days with nasal/ocular discharge |
|--------------------------------|-------------------------------------|-----------------------------------------------|---------------------------------|--------------------|----------------------------------|
| Untreated 1                    | 5.8                                 | 38.9                                          | 0                               | 7                  | 3                                |
| Untreated 2                    | 6.1                                 | <b>39.6</b>                                   | 0                               | 1                  | 0                                |
| Untreated 3                    | 6.5                                 | 39.2                                          | 0                               | 1                  | 1                                |
| Untreated 4                    | 3.4                                 | 38.9                                          | 0                               | 3                  | 0                                |
| Untreated 5                    | 0.3                                 | 39.3                                          | 0                               | 3                  | 0                                |
| Untreated 6                    | 1.4                                 | 39.3                                          | 0                               | 3                  | 0                                |
| Untreated 7                    | 11.6                                | 38.7                                          | 0                               | 4                  | 0                                |
| Mupirocin treated 1            | 6.5                                 | 38.6                                          | 1                               | 8                  | 1                                |
| Mupirocin treated 2            | 12.0                                | <b>39.6</b>                                   | 0.5                             | 7                  | 0                                |
| Mupirocin treated 3            | 6.2                                 | <b>39.6</b>                                   | 0                               | 5                  | 0                                |
| Mupirocin treated 4            | 2.2                                 | 38.4                                          | 0                               | 4                  | 0                                |
| Mupirocin treated 5            | 1.6                                 | 38.7                                          | 0                               | 3                  | 1                                |
| Mupirocin treated 6            | 0.9                                 | <b>39.7</b>                                   | 0                               | 4                  | 1                                |
| Mupirocin treated 7            | 7.6                                 | 38.5                                          | 0                               | 4                  | 0                                |
| Mupirocin treated 8            | 0.4                                 | 39.0                                          | 0                               | 4                  | 0                                |
| Vehicle treated 1              | 0.6                                 | 38.6                                          | 0                               | 2                  | 0                                |
| Vehicle treated 2              | 4.9                                 | 38.9                                          | 0                               | 7                  | 0                                |
| Vehicle treated 3              | 8.7                                 | 39.3                                          | 0                               | 4                  | 0                                |
| <i>S.pneumoniae</i> infected 1 | 7                                   | 39.2                                          | 1                               | 7                  | 4                                |
| <i>S.pneumoniae</i> infected 2 | 2.6                                 | 39.4                                          | 1                               | 6                  | 4                                |
| <i>S.pneumoniae</i> infected 3 | 8.0                                 | <b>40.3</b>                                   | 1                               | 9                  | 4                                |
| <i>S.pneumoniae</i> infected 4 | 23.3                                | <b>39.8</b>                                   | 0                               | 9                  | 5                                |
| <i>S.pneumoniae</i> infected 5 | 20.1                                | 39.4                                          | 0                               | 7                  | 5                                |

<sup>a</sup> Fever defined by temperature greater than 39.5°C

<sup>b</sup> Lethargy score: 0= alert and playful, 1=alert, playful when stimulated, 2=alert, not playful when stimulated, 3=neither alert nor playful when stimulated
